# Supplementary material
Source: publisher site journal article supplement (https://www.dovepress.com/article/235022)
Supplement: Supplementary file 1 [file get_supplementary_file.php]

## Supplementary Tables

Supplementary Table 1. The correlation between MMP11 expression and other clinical features in patients with GC

| Clinical features       | No. Cases | MMP11 expression |           | P-value |
|-------------------------|-----------|------------------|-----------|---------|
|                         |           | High (%)         | Low (%)   |         |
| Gender                  |           |                  |           |         |
| Male                    | 121       | 82 (67.8)        | 39 (32.2) | 0.436   |
| Female                  | 38        | 23 (60.5)        | 15 (39.5) |         |
| Age                     |           |                  |           |         |
| ≥60                     | 74        | 48 (64.9)        | 26 (35.1) | 0.867   |
| <60                     | 85        | 57 (67.1)        | 28 (32.9) |         |
| Tumor site              |           |                  |           |         |
| Cardiac cancer          | 50        | 28 (56.0)        | 22 (44.0) | 0.075   |
| Gastric adenocarcinoma  | 109       | 77 (70.6)        | 32 (29.4) |         |
| Survival status         |           |                  |           |         |
| Live                    | 75        | 38 (50.7)        | 37 (49.3) | <0.001  |
| Dead                    | 84        | 67 (79.8)        | 17 (20.2) |         |
| Lauren's classification |           |                  |           |         |
| Intestinal GC           | 92        | 57 (62.0)        | 35 (38.0) | 0.237   |
| Diffused GC             | 67        | 48 (71.6)        | 19 (28.4) |         |
| TNM stage               |           |                  |           |         |
| I                       | 18        | 8 (44.4)         | 10 (55.6) |         |

|                           |     |           |           |        |
|---------------------------|-----|-----------|-----------|--------|
| II                        | 41  | 22 (53.7) | 19 (46.3) |        |
| III                       | 91  | 66 (72.5) | 25 (27.5) |        |
| IV                        | 9   | 9 (100.0) | 0 (0.0)   | 0.004  |
| Tumor invasive depth (T)  |     |           |           |        |
| 1                         | 8   | 3 (37.5)  | 5 (62.5)  |        |
| 2                         | 17  | 9 (52.9)  | 8 (47.1)  |        |
| 3                         | 69  | 39 (56.5) | 30 (43.5) |        |
| 4                         | 65  | 54 (83.1) | 11 (16.9) | 0.001  |
| Lymph node metastasis (N) |     |           |           |        |
| 0                         | 47  | 23 (48.9) | 24 (51.1) |        |
| 1                         | 22  | 18 (81.8) | 4 (18.2)  |        |
| 2                         | 38  | 25 (65.8) | 13 (34.2) |        |
| 3                         | 52  | 39 (75.0) | 13 (25.0) | 0.017  |
| Distant metastasis (M)    |     |           |           |        |
| Yes                       | 9   | 9 (100.0) | 0 (0.0)   |        |
| No                        | 150 | 96 (64.0) | 54 (36.0) | 0.029  |
| p-STAT3 expression        |     |           |           |        |
| High                      | 97  | 77 (79.4) | 20 (20.6) |        |
| Low                       | 62  | 28 (45.2) | 34 (54.8) | <0.001 |
| GAST expression           |     |           |           |        |
| High                      | 92  | 75 (81.5) | 17 (18.5) |        |
| Low                       | 67  | 30 (44.8) | 37 (55.2) | <0.001 |

Supplementary Table 2. The correlation between p-STAT3 expression and other clinical features in patients with GC

| Clinical features              | No. Cases | p-STAT3 expression |           | P-value |
|--------------------------------|-----------|--------------------|-----------|---------|
|                                |           | High (%)           | Low (%)   |         |
| <b>Gender</b>                  |           |                    |           |         |
| Male                           | 121       | 74 (61.2)          | 47 (38.8) |         |
| Female                         | 38        | 23 (60.5)          | 15 (39.5) | >0.999  |
| <b>Age</b>                     |           |                    |           |         |
| ≥60                            | 74        | 43 (58.1)          | 31 (41.9) |         |
| <60                            | 85        | 54 (63.5)          | 31 (36.5) | 0.517   |
| <b>Tumor site</b>              |           |                    |           |         |
| Cardiac cancer                 | 50        | 31 (62.0)          | 19 (38.0) |         |
| Gastric adenocarcinoma         | 109       | 66 (60.6)          | 43 (39.4) | >0.999  |
| <b>Survival status</b>         |           |                    |           |         |
| Live                           | 75        | 42 (56.0)          | 33 (44.0) |         |
| Dead                           | 84        | 55 (65.5)          | 29 (34.5) | 0.256   |
| <b>Lauren's classification</b> |           |                    |           |         |
| Intestinal GC                  | 92        | 56 (60.9)          | 36 (39.1) |         |
| Diffused GC                    | 67        | 41 (61.2)          | 26 (38.8) | >0.999  |
| <b>TNM stage</b>               |           |                    |           |         |
| I                              | 18        | 7 (38.9)           | 11 (61.1) |         |

|                        |     |           |           |        |
|------------------------|-----|-----------|-----------|--------|
| II                     | 41  | 24 (58.5) | 17 (41.5) |        |
| III                    | 91  | 60 (65.9) | 31 (34.1) |        |
| IV                     | 9   | 6 (66.7)  | 3 (33.3)  | 0.185  |
| Tumor invasive depth   |     |           |           |        |
| (T)                    |     |           |           |        |
| 1                      | 8   | 4 (50.0)  | 4 (50.0)  |        |
| 2                      | 17  | 8 (47.1)  | 9 (52.9)  |        |
| 3                      | 69  | 44 (63.8) | 25 (36.2) |        |
| 4                      | 65  | 41 (63.1) | 24 (36.9) | 0.549  |
| Lymph node metastasis  |     |           |           |        |
| (N)                    |     |           |           |        |
| 0                      | 47  | 21 (44.7) | 26 (55.3) |        |
| 1                      | 22  | 17 (77.3) | 5 (22.7)  |        |
| 2                      | 38  | 23 (60.5) | 15 (39.5) |        |
| 3                      | 52  | 36 (69.2) | 16 (30.8) | 0.027  |
| Distant metastasis (M) |     |           |           |        |
| Yes                    | 9   | 6 (66.7)  | 3 (33.3)  |        |
| No                     | 150 | 91 (60.7) | 59 (39.3) | >0.999 |
| MMP11 expression       |     |           |           |        |
| High                   | 105 | 77 (73.3) | 28 (26.7) |        |
| Low                    | 54  | 20 (37.0) | 34 (63.0) | <0.001 |
| GAST expression        |     |           |           |        |

---

|      |    |           |           |       |
|------|----|-----------|-----------|-------|
| High | 92 | 64 (69.6) | 28 (30.4) |       |
| Low  | 67 | 33 (49.3) | 34 (50.7) | 0.013 |

---

Supplementary Table 3. The correlation between GAST expression and other biomarkers in GC samples and normal tissues.

| Other biomarkers   | No. cases | GAST expression |           | P-value | Pearson's R |
|--------------------|-----------|-----------------|-----------|---------|-------------|
|                    |           | High (%)        | Low (%)   |         |             |
| GC samples         | 159       |                 |           |         |             |
| p-STAT3 expression |           |                 |           |         |             |
| High               | 97        | 64 (66.0)       | 33 (34.0) |         |             |
| Low                | 62        | 28 (45.2)       | 34 (54.8) | 0.013   | 0.206       |
| MMP11 expression   |           |                 |           |         |             |
| High               | 105       | 75 (71.4)       | 30 (28.6) |         |             |
| Low                | 54        | 17 (31.5)       | 37 (68.5) | <0.001  | 0.383       |
| Normal samples     | 102       |                 |           |         |             |
| p-STAT3 expression |           |                 |           |         |             |
| High               | 30        | 16 (53.3)       | 14 (46.7) |         |             |
| Low                | 72        | 15 (20.8)       | 57 (79.2) | 0.002   | 0.322       |
| MMP11 expression   |           |                 |           |         |             |
| High               | 25        | 15 (60.0)       | 10 (40.0) |         |             |
| Low                | 77        | 16 (20.8)       | 61 (79.2) | <0.001  | 0.367       |

Supplementary Table 4. Primers, probes and nucleotides

| Target Gene                | Primer  | Sequence (5'-3')                                       |
|----------------------------|---------|--------------------------------------------------------|
| GAST                       | Forward | CAGGTTATGCGCTGTACGGT                                   |
|                            | Reverse | TGATGTAGGCCACGGGATTG                                   |
| Wt-GAST-Luci               | Forward | CCGCTCGAGGAAATGGAAATGCAGCGACTATATG                     |
|                            | Reverse | CGCGCGGCCGCAAGTTCTCATCCTCAGCACTG                       |
| Mut-GAST-Luci              | Forward | GACTTCGGCCGCCGCGATGCTGGTAGATAGAACTAACA                 |
|                            | Reverse | ACCTACCTACCTGAAGCCGGCGGCGCTACGACCATCTA                 |
| miR-30a-3p                 | Forward | GGCCTCGAGCTAAAGAAGGTATATTGC                            |
|                            | Reverse | GGCGGATCCAAAGTAGCCCCTTGAAGT                            |
| miR-30a-3p (RT)            |         | GTCGTATCCAGTGCAGGGTCCGAGGTATTCGCACTGGA<br>TACGACGCTGCA |
| $\beta$ -actin             | Forward | TTAGTTGCGTTACACCCTTTC                                  |
|                            | Reverse | ACCTTCACCGTTCCAGTTT                                    |
| $\beta$ -actin             | Forward | CGGGAATCGTGCGTGACATT                                   |
|                            | Reverse | CTAGAAGCATTGCGGTGGAC                                   |
| miR-30a-3p ISH probe       |         | 5DigN/GCTGCAAACATCCGACTGAAAG/3Dig_N                    |
| U6 ISH probe               |         | CACGAATTTGCGTGTCATCCTT                                 |
| Scramble ISH probe         |         | GTGTAACACGTCTATACGCCCA                                 |
| Overexpressed GAST plasmid | Forward | CCGCTCGAGGAAATGGAAATGCAGCGACTATGTG                     |
|                            | Reverse | CGCGGATCCAAAGTTCTCATCCTCAGCACTG                        |

---

Silenced GAST plasmid

|          |         |                                                                     |
|----------|---------|---------------------------------------------------------------------|
| shGAST-1 | Forward | ATCCGAAGAAGAAGCCTATGGATTTCAAGA<br>GAATCCATAGGCTTCTTCTTCTTTTTTGGAAA  |
|          | Reverse | AGCTTTTCCAAAAAGAAGAAGCCTAT<br>GGATTCTCTTGAAATCCATAGGCTTCTTCTTC      |
| shGAST-2 | Forward | GATCCGAAGAAGCCTATGGATGGATTCAAGA<br>GATCCATCCATAGGCTTCTTCTTTTTTGGAAA |
|          | Reverse | AGCTTTTCCAAAAAGAAGCCTATGGA<br>TGGATCTCTTGAAATCCATCCATAGGCTTCTTC     |

---



## Supplementary Figures and Figure Legends

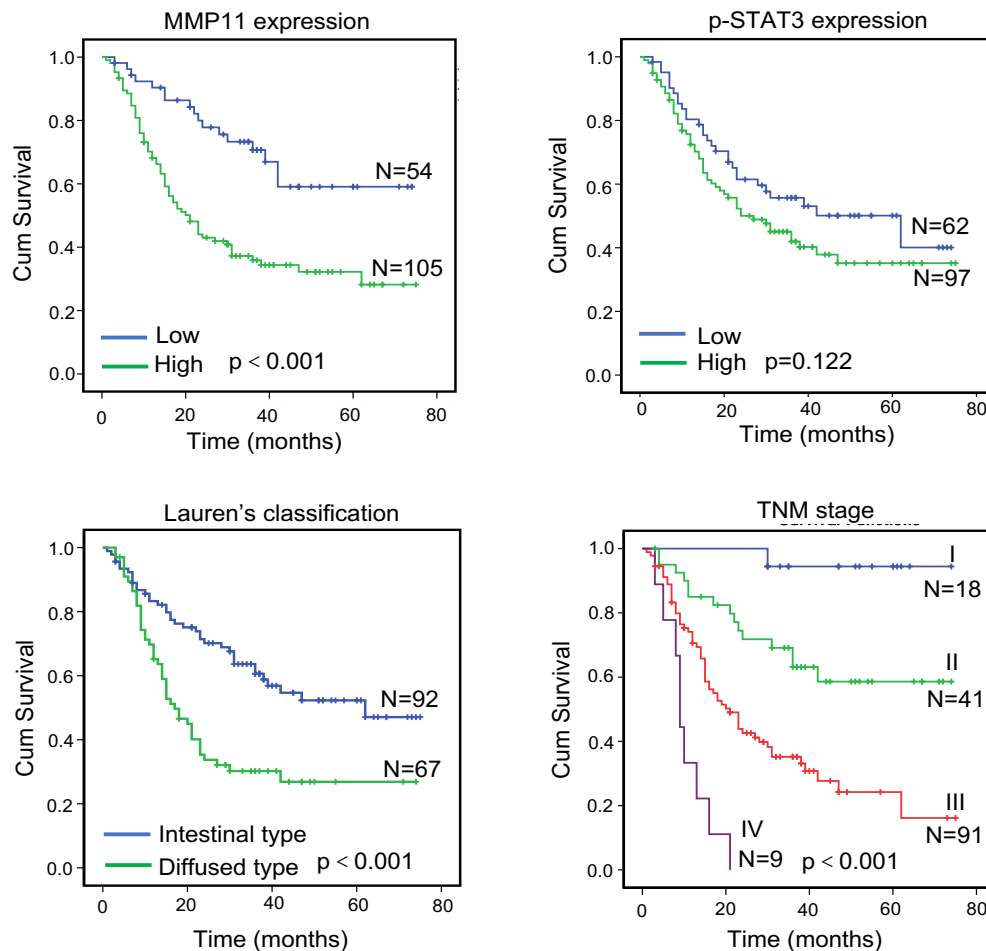

**Supplementary Figure 1.** The prognostic values of clinical features in GC

High level of MMP11 expression was significantly correlated with the poor survival of GC using Kaplan-Meier analysis ( $p < 0.001$ ). High level of p-STAT3 expression was correlated with the poor survival of GC, however, this difference was not statistically significant difference using Kaplan-Meier analysis ( $p = 0.122$ ). Lauren's classification and TNM stage is the important prognostic biomarkers in GC using Kaplan-Meier analyses ( $p < 0.001$ , respectively).

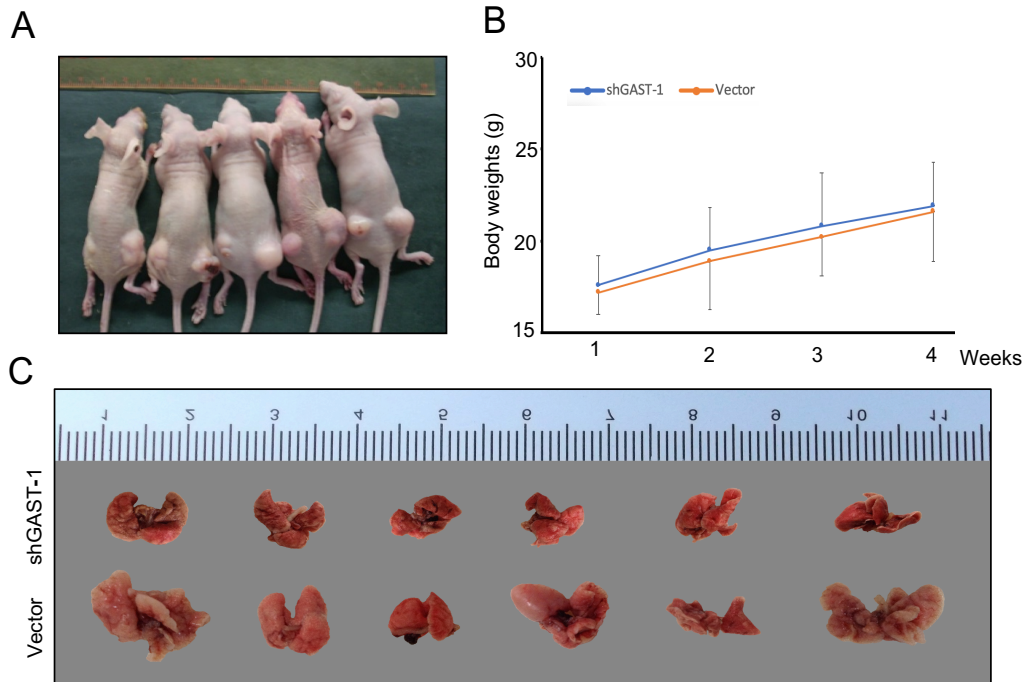

**Supplementary Figure 2.** Silenced GAST suppressed tumor malignancy *in vivo*

A. Downregulation of GAST expression suppressed tumorigenicity in nude mice. Mice injected with silenced GAST cells on the left flank and control cells on the right flank. The mouse on the right formed a bigger tumor from the control cells than from the silenced GAST cells. C. Silencing of GAST in BGC823 cells significantly reduced the number of metastatic lesions in the lungs (n = 6/group). Representative macroscopic appearances of lung metastasis.

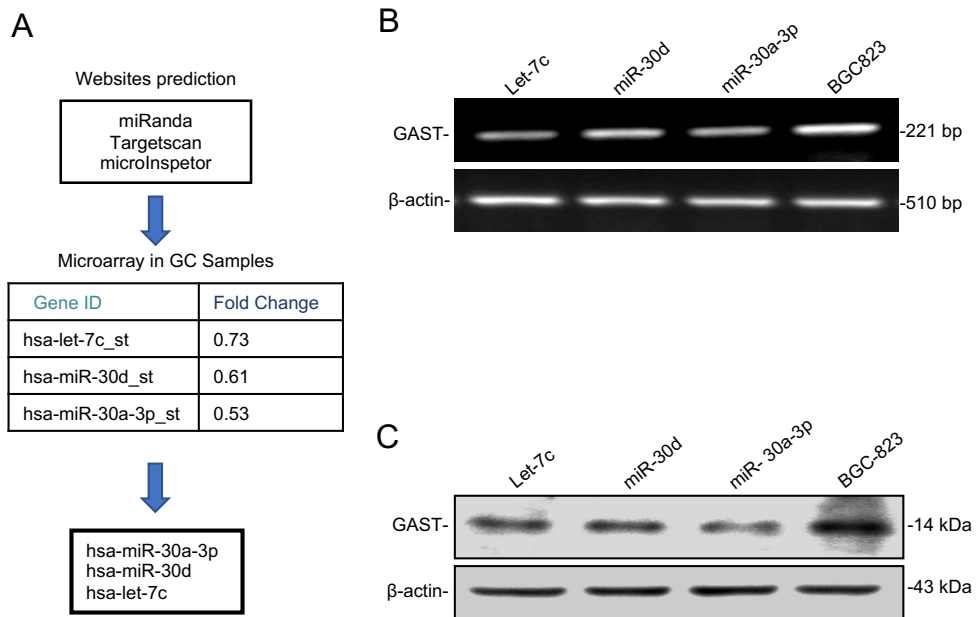

**Supplementary Figure 3.** Bioinformatical identification of miRNAs downregulating the level of GAST expression

A. Based our previous miRNA expression profiling within 10 pairs of tumor and their adjacent normal tissue samples, and we integrated this miRNA expression profiling data with TargetScan website prediction, and identified 3 down-regulated miRNAs that might affect the expression of GAST, miR-30a-3p, miR-30d and let-7c. B, C. Subsequent RT-PCR and Western blot analyses were shown that the mRNA and protein levels of GAST were both suppressed by these three miRNAs when compared with negative control BGC823 cells, indicating that these three miRNAs were negative regulators for GAST. And the most decrease of GAST was correlated with miR-30a-3p.

A

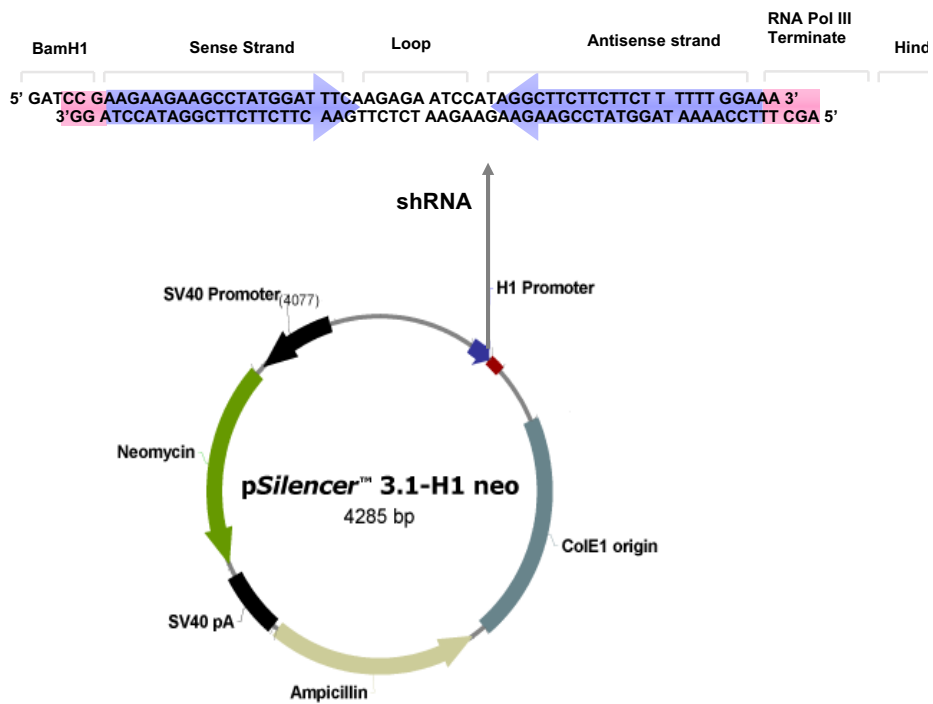

B

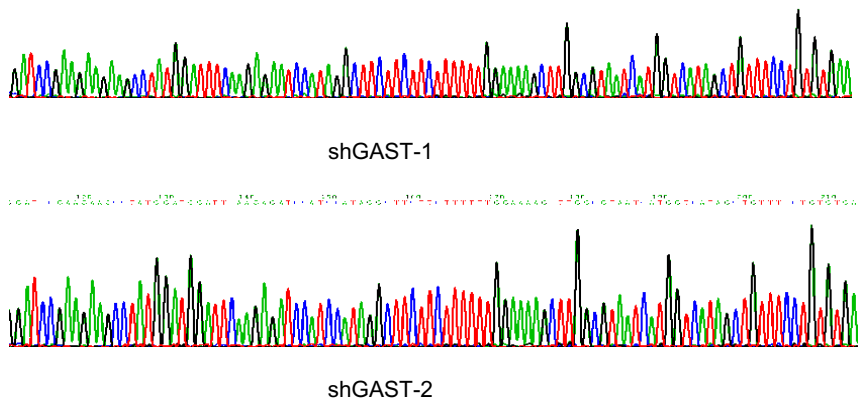

**Supplementary Figure 4.** The silenced GAST plasmids were designed and identified by sequencing

A. The knockdown of GAST plasmids based on the pSilencer 3.1H1 construct. B.

The correct shGAST plasmids identified by sequencing.
